# Supplementary material
Source: Springer Nature journal article supplement (https://www.springermedizin.de/resource/supplementary/12885_2011_3350_MOESM6_ESM.pdf/9463114)

MEF *tg2*<sup>-/-</sup>

MCF-7

Vector

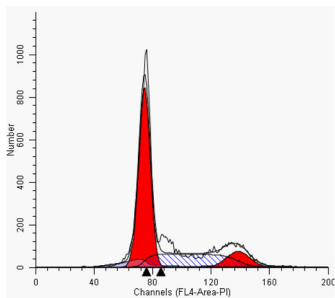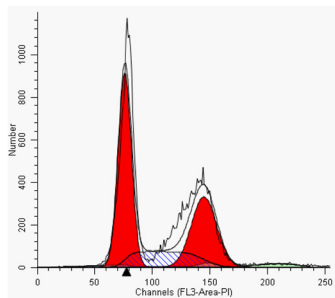

TG2

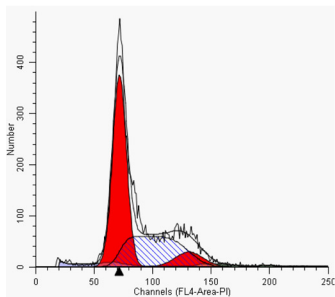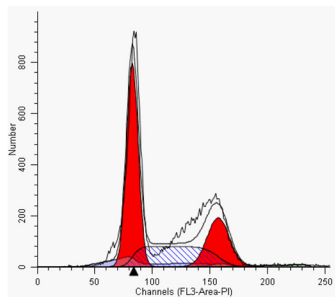

m-TG2

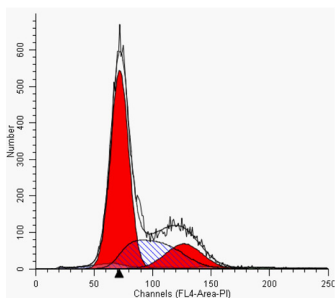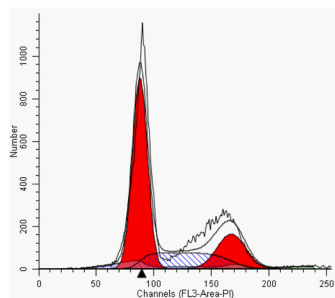

|        | MEF <i>tg2</i> <sup>-/-</sup> |            |            | MCF-7      |            |            |
|--------|-------------------------------|------------|------------|------------|------------|------------|
|        | G1                            | G2         | S          | G1         | G2         | S          |
| Vector | 61.20±5.73                    | 10.78±1.32 | 28.01±2.67 | 48.38±4.58 | 33.33±2.92 | 18.30±2.01 |
| TG2    | 55.95±5.37                    | 8.60±0.96  | 35.46±3.74 | 49.32±5.21 | 22.47±2.50 | 28.21±2.89 |
| mTG2   | 59.89±6.03                    | 15.15±1.49 | 24.96±2.41 | 57.44±5.63 | 19.82±2.02 | 22.75±1.98 |

Supplement: MOESM6 [file 9463114]
